# Supplementary material for: Effect of a typical systemic hospital reform on inpatient expenditure for rural population: the Sanming model in China
Source: Springer Nature journal article supplement (doi:10.1186/s12913-019-4048-7), 2019-04-16

Inpatient mortality rate(%)

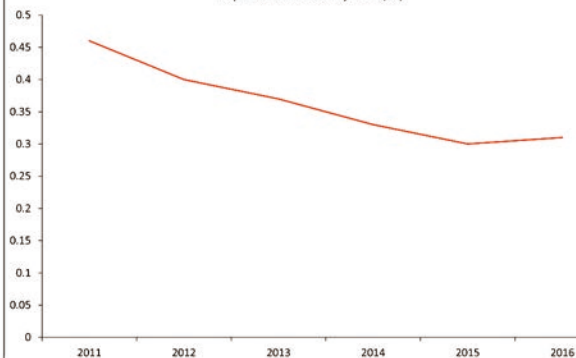

Success rate of emergency treatment(%)

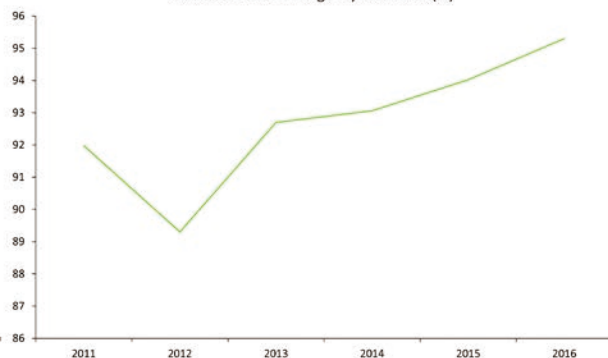

Rate of surgery complication(%)

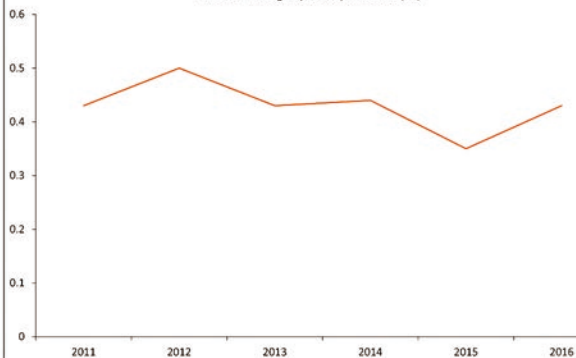

Rate of pressure ulcer(%)

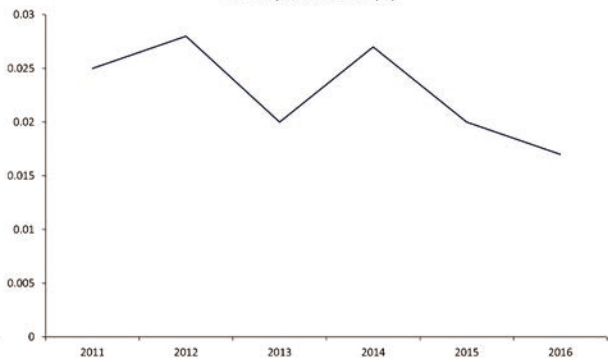

Number of grade III and IV operation(n)

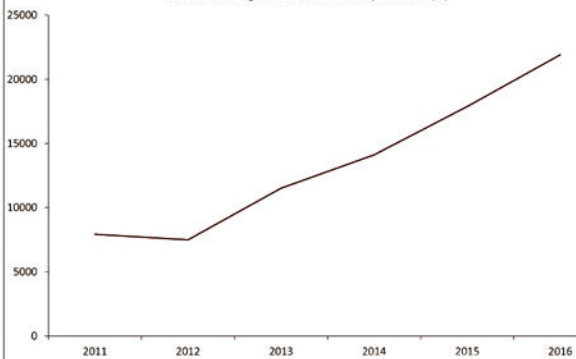

Number of new technology projects(n)

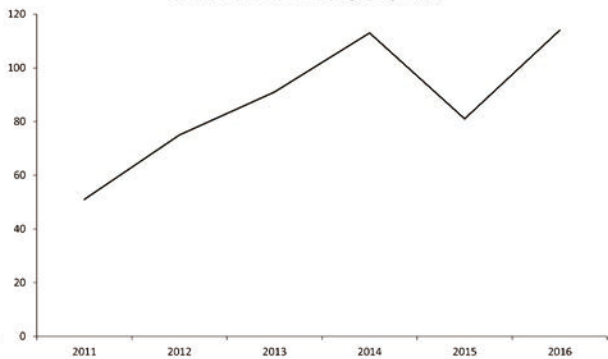

Supplement: MOESM1 [file 16660436]
